# Supplementary figures and images for: Sex Disparities in Cancer Mortality and Survival
Source: Oxford University Press journal article supplement (doi:10.1158/1055-9965.epi-11-0246), 2011-08-01

Male-to-Female MRRs and Sex-Specific Mortality Rates of Nasopharynx by Age, 1977 to 2006.

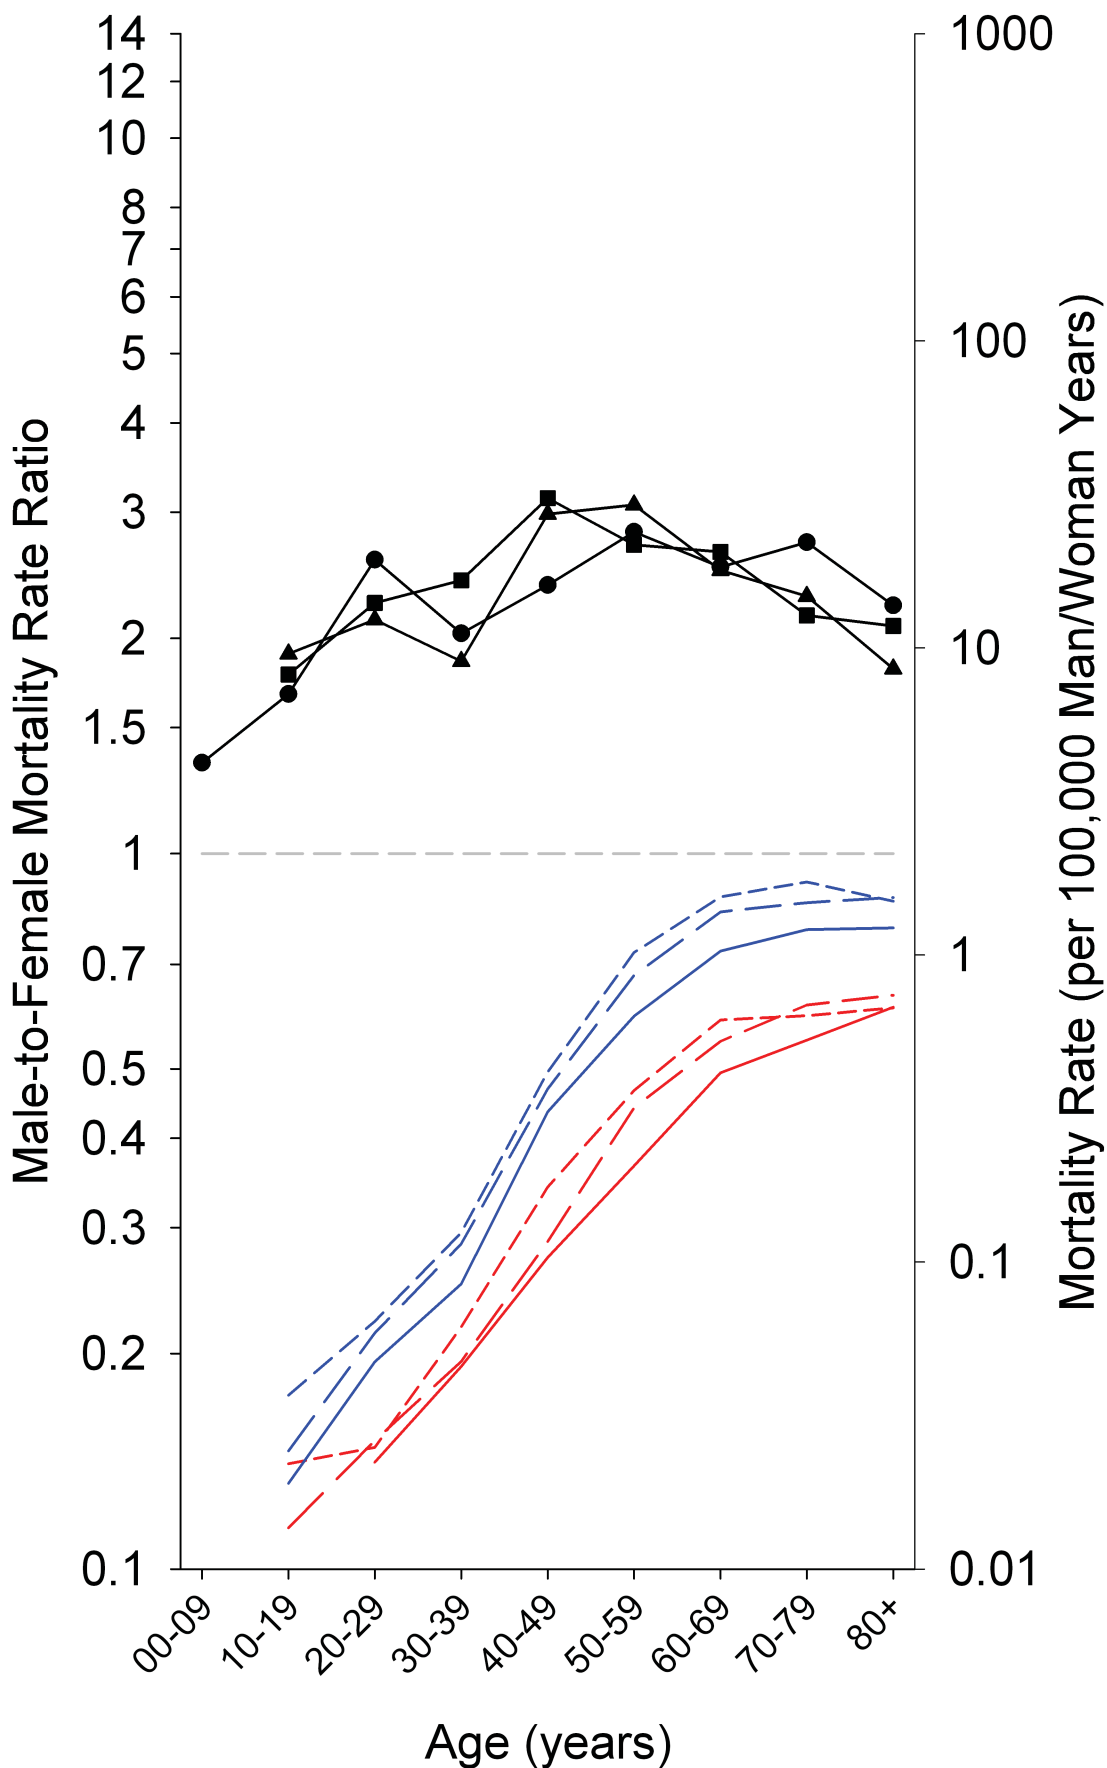

Supplement: 10559965epi110246-sup-figure_20_pdf_182k.pdf [file 10559965epi110246-sup-figure_20_pdf_182k.pdf]
